# Supplementary material for: Hypertriglyceridemic Waist: A Simple Marker of High‐Risk Atherosclerosis Features Associated With Excess Visceral Adiposity/Ectopic Fat
Source: PubMed Central journal article supplement — J Am Heart Assoc. 2018 Apr 13;7(8):e008139. doi: 10.1161/JAHA.117.008139 (PMC6015425; doi:10.1161/jaha.117.008139), 2018-04-13
Supplement: JAH3-7-e008139-s001.pdf [file JAH3-7-e008139-s001.pdf]

# **SUPPLEMENTAL MATERIAL**

**Table S1. Characteristics of the population.**

| <i>n</i> =467                                     |            |
|---------------------------------------------------|------------|
| Age, years                                        | 45.9±14.8  |
| <b>Anthropometry and Adiposity Distribution</b>   |            |
| Body mass index, kg/m <sup>2</sup>                | 26.1±3.6   |
| Waist circumference, cm                           | 92.4±11.4  |
| Hip circumference, cm                             | 99.7±6.7   |
| SAT, mm <sup>3</sup> /5 mm                        | 188.8±87.4 |
| VAT, mm <sup>3</sup> /5 mm                        | 114.8±80.5 |
| Cardiac adipose tissue, mm <sup>3</sup> /5 mm     | 20.2±12.4  |
| Epicardial adipose tissue, mm <sup>3</sup> /5 mm  | 11.5±4.0   |
| Pericardial adipose tissue, mm <sup>3</sup> /5 mm | 8.6±9.6    |
| Hepatic fat fraction, %                           | 7.7±7.8    |
| <b>Cardiometabolic Profile</b>                    |            |
| Systolic blood pressure, mmHg                     | 122±15     |
| Diastolic blood pressure, mmHg                    | 75±10      |
| Fasting glucose, mmol/L                           | 5.35±0.94  |
| Total cholesterol, mmol/L                         | 4.49±1.00  |
| Triglycerides, mmol/L                             | 1.25±0.77  |
| HDL cholesterol, mmol/L                           | 1.32±0.34  |
| LDL cholesterol, mmol/L                           | 2.68±0.94  |
| Total cholesterol/HDL cholesterol ratio           | 3.58±1.14  |
| Hypertriglyceridemic waist, %                     | 10.5       |

|                                                 |      |
|-------------------------------------------------|------|
| Metabolic syndrome, %                           | 13.9 |
| <b>Cardiovascular Therapy at Study Entry, %</b> |      |
| Antiplatelet agent                              | 16.7 |
| Oral anticoagulant                              | 0.9  |
| Lipid-lowering agent                            | 17.8 |
| Beta blockers                                   | 9.9  |
| Calcium channel blockers                        | 3.4  |
| Angiotensin-converting enzyme inhibitors        | 4.7  |
| Angiotensin II receptor blocker                 | 3.4  |

Values are expressed as mean  $\pm$  standard deviation for continuous variables or % for categorical variables. HDL: high-density lipoprotein; LDL: low-density lipoprotein; SAT: subcutaneous abdominal adipose tissue; VAT: visceral abdominal adipose tissue.

**Table S2. Atherosclerosis features of the carotid artery\*.**

| <i>n</i> =467                                         |              |
|-------------------------------------------------------|--------------|
| Presence of carotid atherosclerosis, %                | 61.9         |
| Wall volume, mm <sup>3</sup> /4 mm                    | 141.39±32.67 |
| Maximum wall thickness, mm                            | 1.99±0.53    |
| Normalized wall index <sup>†</sup>                    | 0.57±0.09    |
| LRNC volume, mm <sup>3</sup> /4 mm                    | 3.13±5.04    |
| Calcification volume, mm <sup>3</sup> /4 mm           | 0.19±0.76    |
| Intra-plaque hemorrhage volume, mm <sup>3</sup> /4 mm | 0.06±0.87    |
| Loose matrix volume, mm <sup>3</sup> /4 mm            | 0.65±1.95    |
| Maximum % of LRNC                                     | 7.01±8.39    |
| Carotid Atherosclerosis Score                         | 2.0±0.5      |
| Presence of LRNC, %                                   | 50.1         |
| Presence of calcification, %                          | 13.3         |
| Presence of intra-plaque hemorrhage, %                | 0.7          |
| Presence of loose matrix, %                           | 19.6         |

Values are expressed as mean ± standard deviation for continuous variables or % for categorical variables. LRNC: lipid-rich necrotic core. \*Including the internal carotid artery, the common carotid artery and the carotid bulbs, both proximal and distal. †Normalized for the vessel volume.
